# Supplementary material for: Role of extracellular microRNA-146a-5p in host innate immunity and bacterial sepsis
Source: PubMed Central journal article supplement — iScience. 2021 Nov 13;24(12):103441. doi: 10.1016/j.isci.2021.103441 (PMC8633977; doi:10.1016/j.isci.2021.103441), 2021-11-13
Supplement: mmc1.pdf [file mmc1.pdf]

**iScience, Volume 24**

**Supplemental information**

**Role of extracellular microRNA-146a-5p  
in host innate immunity and bacterial sepsis**

**Sheng Wang, Yang Yang, Andrew Suen, Jing Zhu, Brittney Williams, Jiang Hu, Fengqian Chen, Rosemary Kozar, Shiqian Shen, Ziyi Li, Anjana Jeyaram, Steven M. Jay, Lin Zou, and Wei Chao**

**Table S1. Demographic and Laboratory Data of Septic Patients and Healthy Volunteers, Related to Figure 1.**

|                                                        | <b>Control (n = 8)</b> | <b>Sepsis (n = 10)</b> |
|--------------------------------------------------------|------------------------|------------------------|
| Age, years                                             | 54 [46-65]             | 55 [49 – 66]           |
| Sex, male                                              | 6 (75%)                | 7 (70%)                |
| Ethnicity                                              |                        |                        |
| White                                                  | 4 (50%)                | 5 (50%)                |
| Asian                                                  | 0 (0%)                 | 2 (20%)                |
| Black                                                  | 4 (50%)                | 3 (30%)                |
| Hematology Labs                                        |                        |                        |
| INR ( $\leq 1.1$ )                                     | N/A                    | 1.35 [1.1 - 2.1]       |
| PTT (25-38 sec)                                        | N/A                    | 28 [25 - 40]           |
| Platelets ( $153\text{-}367 \times 10^3/\mu\text{L}$ ) | N/A                    | 164 [94 – 206]         |
| Plasma IL-6 (pg/ml)                                    | N.D.                   | 1955.6 $\pm$ 2803.1    |
| Plasma TNF $\alpha$ (pg/ml)                            | N.D.                   | 11.39 $\pm$ 16.4       |
| Plasma RNA (ng/ml)                                     | 40.4 $\pm$ 6.1         | 109.2 $\pm$ 60.7*      |

Patient demographics, coagulation parameters, and plasma markers were measured at 24 hours after sepsis diagnosis. Data are displayed as median [interquartile range], number (percentage), or mean  $\pm$  SD. N/A, not available. N.D., not detectable. \*  $p < 0.05$ .

**Table S2. Target genes and their function regulated by selected miRNAs identified in septic mice and humans, Related to Figure 1.**

|                    | <b>Target Genes</b>    | <b>Functions</b>                   | <b>References</b>                        |
|--------------------|------------------------|------------------------------------|------------------------------------------|
| <b>miR-146a-5p</b> | Irak1, Traf6           | Macrophage activity                | (Boldin et al., 2011)                    |
|                    | Hes1, Notch1           | Macrophage polarization            | (Huang et al., 2016)                     |
|                    | Relb                   | Monocyte activity                  | (Etzrodt et al., 2012)                   |
|                    | Ifng, Nos2             | Lymphocyte activity                | (Dai et al., 2008)                       |
|                    | Egr1                   | B cell proliferation               | (Contreras et al., 2015)                 |
|                    | Stat1                  | Treg activity                      | (Lu et al., 2010)                        |
| <b>miR-22-3p</b>   | Cdc25c, Erbb3, Mecom   | Breast cancer metastasis           | (Patel et al., 2011)                     |
|                    | Irf8, Bcl2             | Dendritic cell development         | (Li et al., 2012; Min et al., 2013)      |
|                    | Ppara, Sirt1, Hdac4    | Cardiac hypertrophy                | (Gurha et al., 2013; Huang et al., 2013) |
|                    | Max                    | Cell cycle length                  | (Berenguer et al., 2013)                 |
| <b>miR-122-5p</b>  | Slc7a1                 | Amino acids transportation         | (Chang et al., 2004)                     |
|                    | Noct                   | Liver circadian                    | (Kojima et al., 2010)                    |
|                    | Hfe, Hju, Bmpr1a, Hamp | Systemic iron metabolism           | (Castoldi et al., 2011)                  |
|                    | Klf6                   | Hepatocarcinogenesis               | (Tsai et al., 2012)                      |
|                    | c-Myc                  | Liver growth                       | (Yarushkin et al., 2017)                 |
| <b>miR-10a-5p</b>  | Hdac4                  | Smooth muscle cell differentiation | (Huang et al., 2010)                     |
|                    | Bim                    | Apoptosis                          | (Ho et al., 2011)                        |
|                    | Klf4                   | Activate wnt signal                | (Stadthagen et al., 2013)                |

## References for Table S2:

- Berenguer, J., Herrera, A., Vuolo, L., Torroba, B., Llorens, F., Sumoy, L., and Pons, S. (2013). MicroRNA 22 regulates cell cycle length in cerebellar granular neuron precursors. *Mol Cell Biol* 33, 2706-2717. 10.1128/mcb.00338-13 PMID - 23671190.
- Boldin, M.P., Taganov, K.D., Rao, D.S., Yang, L., Zhao, J.L., Kalwani, M., Garcia-Flores, Y., Luong, M., Devrekanli, A., Xu, J., et al. (2011). miR-146a is a significant brake on autoimmunity, myeloproliferation, and cancer in mice. *J Exp Med* 208, 1189-1201. 10.1084/jem.20101823.
- Castoldi, M., Vujic Spasic, M., Altamura, S., Elmen, J., Lindow, M., Kiss, J., Stolte, J., Sparla, R., D'Alessandro, L.A., Klingmuller, U., et al. (2011). The liver-specific microRNA miR-122 controls systemic iron homeostasis in mice. *J Clin Invest* 121, 1386-1396. 10.1172/JCI44883.
- Chang, J., Nicolas, E., Marks, D., Sander, C., Lerro, A., Buendia, M.A., Xu, C., Mason, W.S., Moloshok, T., Bort, R., et al. (2004). miR-122, a mammalian liver-specific microRNA, is processed from hcr mRNA and may downregulate the high affinity cationic amino acid transporter CAT-1. *RNA Biol* 1, 106-113. 10.4161/rna.1.2.1066 PMID - 17179747.
- Contreras, J.R., Palanichamy, J.K., Tran, T.M., Fernando, T.R., Rodriguez-Malave, N.I., Goswami, N., Arboleda, V.A., Casero, D., and Rao, D.S. (2015). MicroRNA-146a modulates B-cell oncogenesis by regulating Egr1. *Oncotarget* 6, 11023-11037. 10.18632/oncotarget.3433 PMID - 25906746.
- Dai, R., Phillips, R.A., Zhang, Y., Khan, D., Crasta, O., and Ahmed, S.A. (2008). Suppression of LPS-induced Interferon-gamma and nitric oxide in splenic lymphocytes by select estrogen-regulated microRNAs: a novel mechanism of immune modulation. *Blood* 112, 4591-4597. 10.1182/blood-2008-04-152488 PMID - 18791161.
- Etzrodt, M., Cortez-Retamozo, V., Newton, A., Zhao, J., Ng, A., Wildgruber, M., Romero, P., Wurdinger, T., Xavier, R., Geissmann, F., et al. (2012). Regulation of monocyte functional heterogeneity by miR-146a and Relb. *Cell Rep* 1, 317-324. 10.1016/j.celrep.2012.02.009 PMID - 22545247.
- Gurha, P., Wang, T., Larimore, A.H., Sassi, Y., Abreu-Goodger, C., Ramirez, M.O., Reddy, A.K., Engelhardt, S., Taffet, G.E., Wehrens, X.H., et al. (2013). microRNA-22 promotes heart failure through coordinate suppression of PPAR/ERR-nuclear hormone receptor transcription. *PLoS One* 8, e75882. 10.1371/journal.pone.0075882 PMID - 24086656.
- Ho, J., Pandey, P., Schatton, T., Sims-Lucas, S., Khalid, M., Frank, M.H., Hartwig, S., and Kreidberg, J.A. (2011). The pro-apoptotic protein Bim is a microRNA target in kidney progenitors. *J Am Soc Nephrol* 22, 1053-1063. 10.1681/asn.2010080841 PMID - 21546576.
- Huang, C., Liu, X.J., QunZhou, Xie, J., Ma, T.T., Meng, X.M., and Li, J. (2016). MiR-146a modulates macrophage polarization by inhibiting Notch1 pathway in RAW264.7 macrophages. *Int Immunopharmacol* 32, 46-54. 10.1016/j.intimp.2016.01.009 PMID - 26800097.
- Huang, H., Xie, C., Sun, X., Ritchie, R.P., Zhang, J., and Chen, Y.E. (2010). miR-10a contributes to retinoid acid-induced smooth muscle cell differentiation. *J Biol Chem* 285, 9383-9389. 10.1074/jbc.m109.095612 PMID - 20118242.
- Huang, Z.P., Chen, J., Seok, H.Y., Zhang, Z., Kataoka, M., Hu, X., and Wang, D.Z. (2013). MicroRNA-22 regulates cardiac hypertrophy and remodeling in response to stress. *Circ Res* 112, 1234-1243. 10.1161/circresaha.112.300682 PMID - 23524588.

Kojima, S., Gatfield, D., Esau, C.C., and Green, C.B. (2010). MicroRNA-122 modulates the rhythmic expression profile of the circadian deadenylase Nocturnin in mouse liver. *PLoS One* 5, e11264. 10.1371/journal.pone.0011264 PMID - 20582318.

Li, H.S., Greeley, N., Sugimoto, N., Liu, Y.J., and Watowich, S.S. (2012). miR-22 controls *Irf8* mRNA abundance and murine dendritic cell development. *PLoS One* 7, e52341. 10.1371/journal.pone.0052341 PMID - 23251709.

Lu, L.F., Boldin, M.P., Chaudhry, A., Lin, L.L., Taganov, K.D., Hanada, T., Yoshimura, A., Baltimore, D., and Rudensky, A.Y. (2010). Function of miR-146a in controlling Treg cell-mediated regulation of Th1 responses. *Cell* 142, 914-929. 10.1016/j.cell.2010.08.012 PMID - 20850013.

Min, S., Liang, X., Zhang, M., Zhang, Y., Mei, S., Liu, J., Liu, J., Su, X., Cao, S., Zhong, X., et al. (2013). Multiple tumor-associated microRNAs modulate the survival and longevity of dendritic cells by targeting YWHAZ and Bcl2 signaling pathways. *J Immunol* 190, 2437-2446. 10.4049/jimmunol.1202282 PMID - 23355742.

Patel, J.B., Appaiah, H.N., Burnett, R.M., Bhat-Nakshatri, P., Wang, G., Mehta, R., Badve, S., Thomson, M.J., Hammond, S., Steeg, P., et al. (2011). Control of EVI-1 oncogene expression in metastatic breast cancer cells through microRNA miR-22. *Oncogene* 30, 1290-1301. 10.1038/onc.2010.510 PMID - 21057539.

Stadthagen, G., Tehler, D., Hoyland-Kroghsbo, N.M., Wen, J., Krogh, A., Jensen, K.T., Santoni-Rugiu, E., Engelholm, L.H., and Lund, A.H. (2013). Loss of miR-10a activates *Ipo* and collaborates with activated Wnt signaling in inducing intestinal neoplasia in female mice. *PLoS Genet* 9, e1003913. 10.1371/journal.pgen.1003913 PMID - 24204315.

Tsai, W.C., Hsu, S.D., Hsu, C.S., Lai, T.C., Chen, S.J., Shen, R., Huang, Y., Chen, H.C., Lee, C.H., Tsai, T.F., et al. (2012). MicroRNA-122 plays a critical role in liver homeostasis and hepatocarcinogenesis. *J Clin Invest* 122, 2884-2897. 10.1172/jci63455 PMID - 22820290.

Yarushkin, A.A., Kazantseva, Y.A., Kobelev, V.S., Pustyl'nyak, Y.A., and Pustyl'nyak, V.O. (2017). Peroxisome proliferator-activated receptor gamma activation inhibits liver growth through miR-122-mediated downregulation of cMyc. *Eur J Pharmacol* 797, 39-44. 10.1016/j.ejphar.2017.01.016 PMID - 28095325.

**Table S3. Primer sequences, Related to Figure 2, Figure 3, Figure 4, and Figure 6.**

| <b>Genes (Mouse)</b>          | <b>Primer Sequence</b>                                                           |
|-------------------------------|----------------------------------------------------------------------------------|
| <i>Gapdh</i>                  | Forward 5'-AACTTTGGCATTGTGGAAGG-3'<br>Reverse 5'-GGATGCAGGGATGATGTTCT-3'         |
| <i>Il-1<math>\beta</math></i> | Forward 5'-GCCCATCCTCTGTGACTCAT-3'<br>Reverse 5'-AGGCCACAGGTATTTTGTCTG-3'        |
| <i>Il-6</i>                   | Forward 5'-AGTTGCCTTCTTGGGACTGA-3'<br>Reverse 5'-TCCACGATTTCCCAGAGAAC-3'         |
| <i>Il-10</i>                  | Forward 5'-GCTCTTACTGACTGGCATGAG-3'<br>Reverse 5'-CGCAGCTCTAGGAGCATGTG-3'        |
| <i>Cxcl2</i>                  | Forward 5'-CCGCTGTTGTGGCCAGTGAAGTGC-3'<br>Reverse 5'-TTAGCCTTGCCTTTGTTTCAGTAT-3' |
| <i>Tnfa</i>                   | Forward 5'-CTGGGACAGTGACCTGGACT-3'<br>Reverse 5'-GCACCTCAGGGAAGAGTCTG-3'         |
| <i>Irak-1</i>                 | Forward 5'-GCCACCTGAGTTCTATCACA-3'<br>Reverse 5'-GCCACCTGAGTTCTATCACA-3'         |
| <i>Kim-1</i>                  | Forward 5'-CATTTAGGCCTCATACTGC-3'<br>Reverse 5'-ACAAGCAGAAGATGGGCATT-3'          |

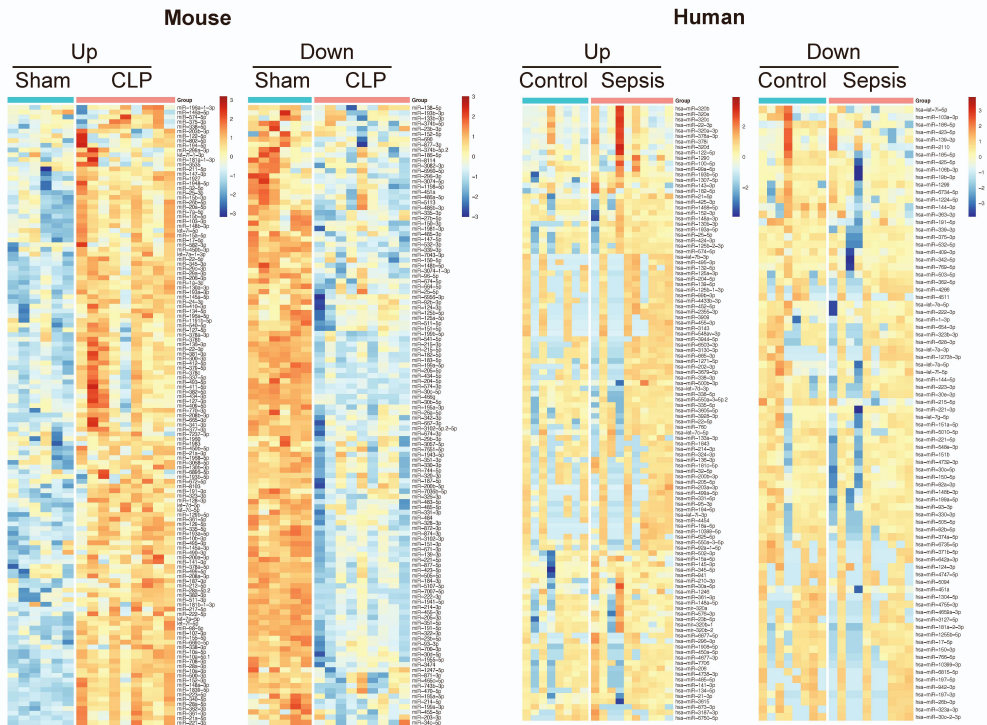

**Figure S1.** Heatmap showing differential expression of plasma miRNAs between control and sepsis in mice and humans, Related to Figure 1.

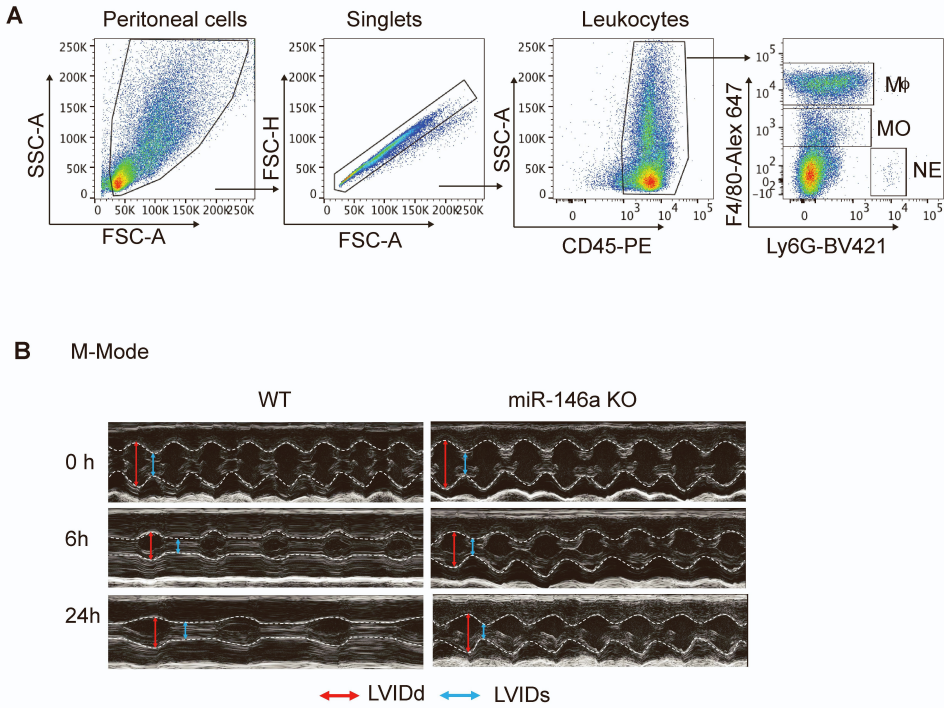

**Figure S2.** (A) Gating strategy of flow cytometry in peritoneal cells. Macrophages were characterized as CD45<sup>+</sup>F4/80<sup>high</sup>Ly6G<sup>-</sup>, neutrophils CD45<sup>+</sup>F4/80<sup>+</sup>Ly6G<sup>+</sup>, and monocytes CD45<sup>+</sup>F4/80<sup>low</sup>Ly6G<sup>-</sup>; Related to Figure 2. (B) Representative M-mode images of transthoracic echocardiography of WT and miR-146a<sup>-/-</sup> mice at baseline (0 hour), 6 hours, and 24 hours after CLP procedure. LVIDd: left ventricular internal dimension at end-diastole; LVIDs: left ventricular internal dimension at end-systole, Related to Figure 6.



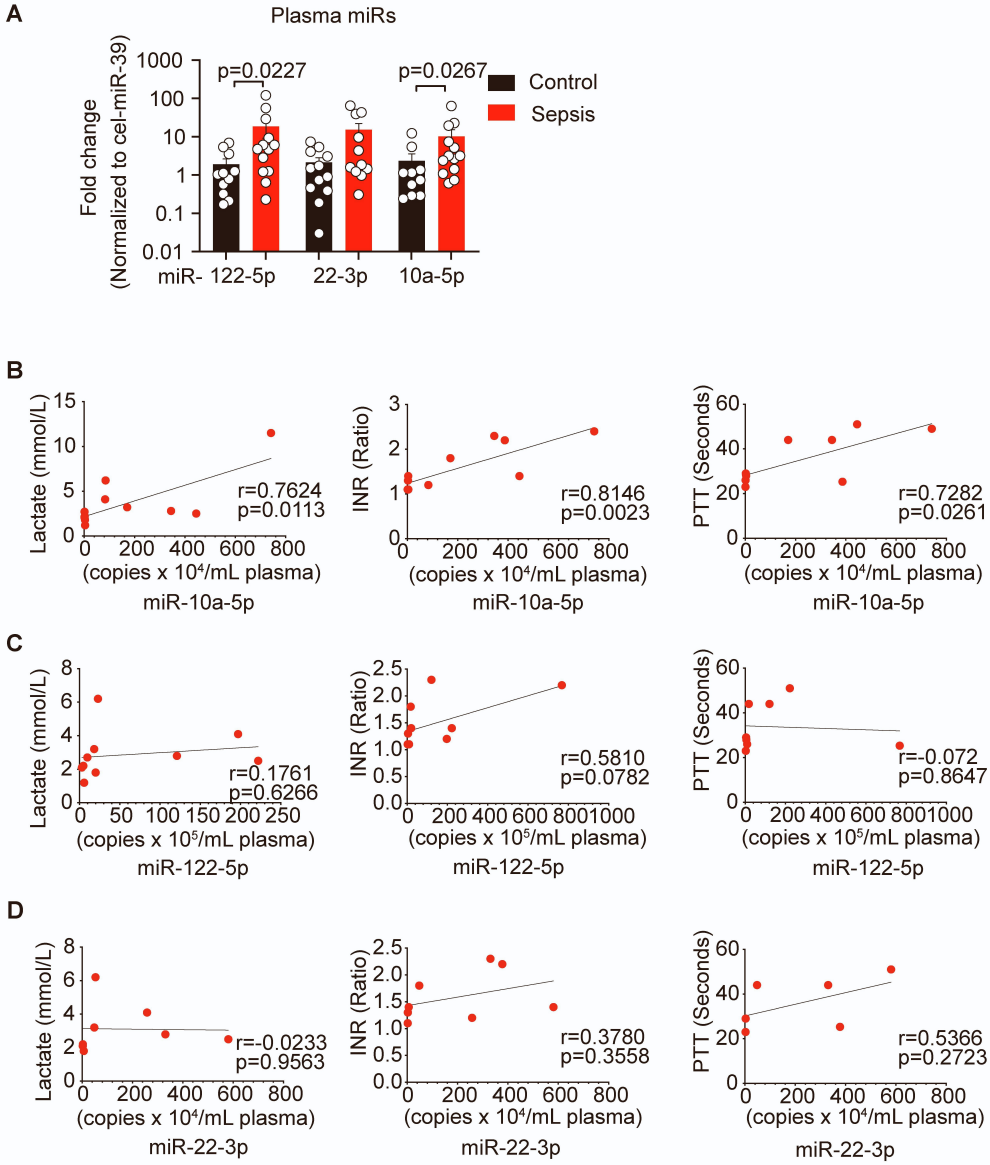

**Figure S3.** Pearson's correlation between the plasma miRNA (miR-10a-5p, miR-122a-5p, miR-22-3p) concentrations and the clinical parameters - serum lactate, blood international normalized ratio (INR), and partial thromboplastin time (PTT) in septic humans. n=11-13. Related to Figure 6.
